# Supplementary material for: Genome-wide analysis of DNA methylation and gene expression changes in an ovalbumin-induced asthma mouse model
Source: PubMed Central journal article supplement — Mol Med Rep. 2020 Jun 17;22(3):1709–16. doi: 10.3892/mmr.2020.11245 (PMC7411290; doi:10.3892/mmr.2020.11245), 2020-06-17
Supplement: Supplementary_Data.pdf [file Supplementary_Data.pdf]

Figure S1. Pathophysiological evidence of OVA-induced asthma. (A) Histology for lung tissue, (B) eosinophils count in BALF and (C) IL-4 level in BALF. Scale bar, 50  $\mu$ m.  $^{##}P < 0.01$  vs. NC. OVA, ovalbumin; NC, normal control; IL, interleukin; BALF, bronchoalveolar lavage fluid.

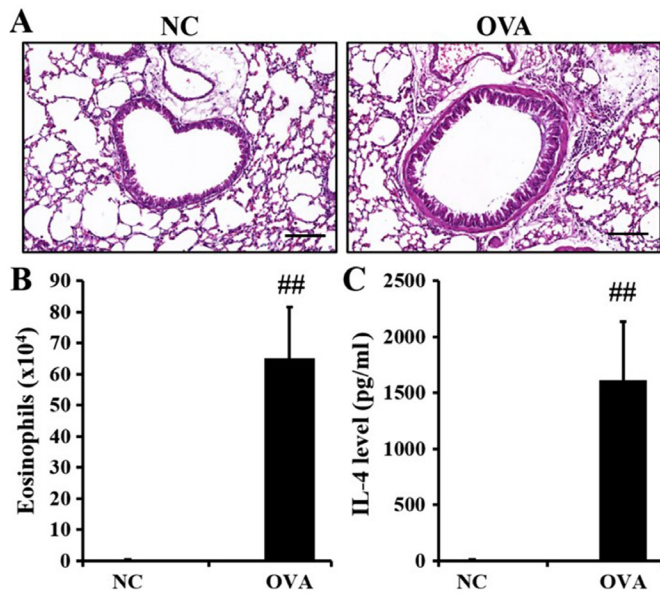

Table S1. Hyper-KEGG pathway functional annotation of DEGs and gene expression.

| Term                                              | Count | %           | P-value               | List total | Pop hits | Pop total | Fold enrichment | Bonferroni            | Benjamini             | FDR         |
|---------------------------------------------------|-------|-------------|-----------------------|------------|----------|-----------|-----------------|-----------------------|-----------------------|-------------|
| mmu04510: Focal adhesion                          | 24    | 3.283173735 | 1.94x10 <sup>-6</sup> | 224        | 198      | 5738      | 3.104978355     | 2.81x10 <sup>-4</sup> | 2.81x10 <sup>-4</sup> | 0.002298853 |
| mmu04512: ECM-receptor interaction                | 12    | 1.641586867 | 3.26x10 <sup>-4</sup> | 224        | 83       | 5738      | 3.703528399     | 0.046199094           | 0.023372689           | 0.386513354 |
| mmu04666: Fc gamma R-mediated phagocytosis        | 13    | 1.778385773 | 3.72x10 <sup>-4</sup> | 224        | 98       | 5738      | 3.398050292     | 0.052510261           | 0.017819053           | 0.440642841 |
| mmu04914: Progesterone-mediated oocyte maturation | 12    | 1.641586867 | 4.03x10 <sup>-4</sup> | 224        | 85       | 5738      | 3.616386555     | 0.056718967           | 0.014491725           | 0.476924273 |
| mmu04070: Phosphatidylinositol signaling system   | 11    | 1.504787962 | 5.79x10 <sup>-4</sup> | 224        | 75       | 5738      | 3.75702381      | 0.080612469           | 0.01666902            | 0.685760966 |
| mmu00562: Inositol phosphate metabolism           | 9     | 1.23119015  | 0.001018121           | 224        | 54       | 5738      | 4.269345238     | 0.137312489           | 0.024316595           | 1.202005187 |
| mmu04810: Regulation of actin cytoskeleton        | 19    | 2.599179207 | 0.001799596           | 224        | 217      | 5738      | 2.24288183      | 0.229854989           | 0.036623446           | 2.115631468 |
| mmu04930: Type II diabetes mellitus               | 8     | 1.094391245 | 0.002600114           | 224        | 49       | 5738      | 4.182215743     | 0.314431972           | 0.046092377           | 3.043494008 |
| mmu04020: Calcium signaling pathway               | 17    | 2.325581395 | 0.002904479           | 224        | 191      | 5738      | 2.279964473     | 0.344110017           | 0.045781376           | 3.394157488 |
| mmu04912: GnRH signaling pathway                  | 11    | 1.504787962 | 0.004174862           | 224        | 97       | 5738      | 2.904915317     | 0.454810699           | 0.058858916           | 4.845282988 |
| mmu04270: Vascular smooth muscle contraction      | 12    | 1.641586867 | 0.006658712           | 224        | 120      | 5738      | 2.561607143     | 0.620439831           | 0.084300906           | 7.625007583 |
| mmu05414: Dilated cardiomyopathy                  | 10    | 1.367989056 | 0.009058717           | 224        | 92       | 5738      | 2.78435559      | 0.732730948           | 0.104128496           | 10.24006457 |
| mmu04621: NOD-like receptor signaling pathway     | 8     | 1.094391245 | 0.009725005           | 224        | 62       | 5738      | 3.305299539     | 0.757566356           | 0.103271461           | 10.95393476 |
| mmu04062: Chemokine signaling pathway             | 15    | 2.051983584 | 0.010896598           | 224        | 182      | 5738      | 2.111214678     | 0.795804631           | 0.107275274           | 12.19659821 |
| mmu04710: Circadian rhythm                        | 4     | 0.547195622 | 0.01240693            | 224        | 13       | 5738      | 7.881868132     | 0.836388093           | 0.113685896           | 13.77511641 |
| mmu04150: mTOR signaling pathway                  | 7     | 0.957592339 | 0.017524805           | 224        | 54       | 5738      | 3.320601852     | 0.922975091           | 0.148049328           | 18.93281671 |
| mmu05221: Acute myeloid leukemia                  | 7     | 0.957592339 | 0.022377366           | 224        | 57       | 5738      | 3.145833333     | 0.962430885           | 0.175545814           | 23.56063983 |
| mmu04722: Neurotrophin signaling pathway          | 11    | 1.504787962 | 0.029242219           | 224        | 130      | 5738      | 2.167513736     | 0.986476857           | 0.212644294           | 29.69509961 |
| mmu05410: Hypertrophic cardiomyopathy             | 8     | 1.094391245 | 0.043938939           | 224        | 84       | 5738      | 2.43962585      | 0.998519473           | 0.29030042            | 41.3411804  |
| mmu05200: Pathways in cancer                      | 20    | 2.735978112 | 0.045067727           | 224        | 323      | 5738      | 1.586134454     | 0.998752551           | 0.284184432           | 42.15810861 |

Program: David Functional Annotation tool; Input: DEG 841 genes (P<0.05 and logFC ≥ 11 and logCPM ≥ 11); KEGG\_PATHWAY (Top 20); KEGG, Kyoto Encyclopedia of Genes and Genomes; DEG, differentially expressed gene; FDR, false discovery rate; FC, fold change; CPM, counts per million.

Table SII. Hypo-KEGG pathway functional annotation of DEGs and gene expression.

| Term                                       | Count | %           | P-value                | List total | Pop hits | Pop total | Fold enrichment | Bonferroni             | Benjamini              | FDR                    |
|--------------------------------------------|-------|-------------|------------------------|------------|----------|-----------|-----------------|------------------------|------------------------|------------------------|
| mmu03010: Ribosome                         | 38    | 4.008438819 | 2.12x10 <sup>-21</sup> | 379        | 89       | 5738      | 6.464202069     | 3.22x10 <sup>-19</sup> | 3.22x10 <sup>-19</sup> | 2.53x10 <sup>-18</sup> |
| mmu00190: Oxidative phosphorylation        | 25    | 2.637130802 | 2.99x10 <sup>-6</sup>  | 379        | 130      | 5738      | 2.911508017     | 4.54x10 <sup>-4</sup>  | 2.27x10 <sup>-4</sup>  | 0.003578335            |
| mmu05010: Alzheimer's disease              | 27    | 2.848101266 | 1.28x10 <sup>-4</sup>  | 379        | 182      | 5738      | 2.24602047      | 0.019331732            | 0.006485887            | 0.153597442            |
| mmu05012: Parkinson's disease              | 22    | 2.320675105 | 1.39x10 <sup>-4</sup>  | 379        | 133      | 5738      | 2.504334715     | 0.020883027            | 0.005262146            | 0.166043623            |
| mmu04142: Lysosome                         | 19    | 2.004219409 | 7.03x10 <sup>-4</sup>  | 379        | 119      | 5738      | 2.417285648     | 0.101408722            | 0.021158352            | 0.838446192            |
| mmu04510: Focal adhesion                   | 25    | 2.637130802 | 0.002506023            | 379        | 198      | 5738      | 1.911596173     | 0.317090908            | 0.061587432            | 2.95857873             |
| mmu05016: Huntington's disease             | 23    | 2.426160338 | 0.004138336            | 379        | 183      | 5738      | 1.902821633     | 0.467585123            | 0.086112193            | 4.842292354            |
| mmu00565: Ether lipid metabolism           | 8     | 0.843881857 | 0.006852658            | 379        | 35       | 5738      | 3.460535243     | 0.648374738            | 0.122473968            | 7.900613029            |
| mmu04530: Tight junction interaction       | 18    | 1.898734177 | 0.007046512            | 379        | 135      | 5738      | 2.018645558     | 0.658654911            | 0.112573019            | 8.115550446            |
| mmu04512: ECM-receptor interaction         | 12    | 1.265822785 | 0.019412292            | 379        | 83       | 5738      | 2.188892774     | 0.949191121            | 0.257675215            | 20.91372708            |
| mmu00982: Drug metabolism                  | 11    | 1.160337553 | 0.02426932             | 379        | 75       | 5738      | 2.220510114     | 0.976113416            | 0.28786971             | 25.47703692            |
| mmu04666: Fc gamma R-mediated phagocytosis | 13    | 1.371308017 | 0.026519321            | 379        | 98       | 5738      | 2.008346346     | 0.983182744            | 0.288546926            | 27.50806632            |
| mmu04144: Endocytosis                      | 21    | 2.215189873 | 0.042732132            | 379        | 202      | 5738      | 1.573943938     | 0.998690549            | 0.399880651            | 40.70891366            |

Program: David Functional Annotation tool; Input: DEG 1,061 genes (P<0.05 and logFC ≥ 11 and logCPM ≥ 11); KEGG\_PATHWAY: KEGG, Kyoto Encyclopedia of Genes and Genomes; DEG, differentially expressed gene; FDR, false discovery rate; FC, fold change; CPM, counts per million.
